# Supplementary material
Source: publisher site journal article supplement (https://www.spandidos-publications.com/8633/downloadSupplementary)
Supplement: Supplementary file 1 [file downloadSupplementary]

Table SII. Primers for reverse transcription-quantitative PCR.

| Name           | Direction | Sequence, 5'→3'       |
|----------------|-----------|-----------------------|
| GAPDH          | Forward   | CCGCATCTTCTTGTGCAGTG  |
|                | Reverse   | ACCAGCTTCCCATTCTCAGC  |
| CTGF           | Forward   | ATGGTGCACCCTGTGTCTTC  |
|                | Reverse   | TGGCTCGCATCATAGTTGGG  |
| Collagen I     | Forward   | ACATGTTCAGCTTTGTGGACC |
|                | Reverse   | CTTGCATAGCACGCCATCG   |
| TGF- $\beta$ 1 | Forward   | CCCCTACATTTGGAGCCTGG  |
|                | Reverse   | TTGCGACCCACGTAGTAGAC  |
| CCL20          | Forward   | TGCTGCCTCACGTACACAAA  |
|                | Reverse   | CAGCGCACACGGATCTTTTC  |
| CSF1           | Forward   | AGCAGTTGATCGACAGCCAA  |
|                | Reverse   | ACACAGGCCTCGTTCTGTTC  |
| CSF2           | Forward   | AACCCCGGAAACTGACTGTG  |
|                | Reverse   | CTCCTCATTCTGGACCGGC   |

CTGF, connective tissue growth factor; TGF- $\beta$ 1, transforming growth factor- $\beta$ 1; CCL20, C-C motif chemokine ligand 20; CSF1, colony-stimulating factor 1.
